# Supplementary material
Source: Research Square preprint supplement (doi:10.21203/rs.3.rs-9096984/v1)
Supplement: Supplementary file 2 [file 6c19f8ac255f9bb54703c563.docx]

**Appendix A**

You are being asked to take part in a research study about chiropractic faculty approaches to teaching cervical manipulation and the potential risk of cervical artery dissection (CeAD). Survey responses will remain anonymous and will not be separated by institution.

Your participation in this survey is voluntary and you may refuse to take part in the survey at any time without penalty. You are free to decline to answer any particular question you do not wish to answer for any reason and there are no foreseeable risks or discomforts to taking this survey. Your survey answers will be stored in a password protected electronic format. Qualtrics does not collect identifying information and therefore your responses will remain anonymous.

Your participation in this research study involves filling out an electronic survey. This survey should take you 10-15 minutes to complete. 

To begin taking the survey, please click the arrow.

1. Have you taught some form of hands-on cervical manipulation or adjusting in the past 5 years at a college or university? Y/N

- If yes: survey continues If no: survey ends

2. Please select the setting in which you teach cervical adjusting:

- Clinical setting
- Classroom setting
- Prefer not to answer

3. Is the reported correlation between cervical adjusting and cervical artery dissection a subject you discuss when teaching?

4. If yes, which of the following phrases best describes your expert opinion on this association?

- There is no association between cervical adjustments and CeAD.
- There is an association between cervical adjustments and CeAD, but it is never causal.
- There is an association between cervical adjustments and CeAD, but it is very rarely causal.
- There is a causal link between cervical adjustments and CeAD, and certain history and/or examination procedures can reduce the risk of this sequela.
- There is a causal link between cervical adjustments and CeAD, however no changes/selections made in history or examination procedures can reduce the risk of this sequela.
- There is a causal link between cervical adjustments and CeAD, and modification to manipulative technique may influence the risk of CeAD.
- There is a causal link between cervical adjustments and CeAD, however no modification to manipulative technique can influence the risk of CeAD.
- If no continue to question 5.

5. Does the risk of CeAD affect how you teach pretreatment procedures prior to adjusting?

6. If yes, which of the following descriptions most closely aligns with how you teach *pretreatment procedures*?

- - Asking specific history questions or performing specific exam procedures which assess the likelihood of a CeAD already in progress.
  - Asking specific history questions or performing specific exam procedures which assess the likelihood of an underlying condition which increases the risk of CeAD when the patient is adjusted.
  - Asking specific history questions or performing specific exam procedures which assess the likelihood of an underlying condition which increases the risk of CeAD for which adjustments may be erroneously blamed.
  - Other (please describe): ______________________________________________
- If no continue to question 7.

7. If you believe modifications *to cervical adjusting technique* may (or may not) influence the risk of CeAD, which resources/knowledge sources would you say most strongly influence that belief? (choose all that apply)

- Personal/clinical experience
- Clinical experience of colleagues
- Expert opinion of chiropractic educators
- Anatomic and/or cadaveric studies in the scientific literature
- Case reports in the scientific literature
- Narrative reviews of the literature
- Systematic reviews and meta-analyses of the literature
- Other (please specify): ___________________________________________________________

8. Does the risk of CeAD affect how you teach adjusting technique of the upper cervical spine only or the entire cervical spine?

9. Upper cervical spine only

- Which of the following descriptions most closely aligns with the modification(s) to adjusting technique of the *upper cervical spine* when you teach?
- Minimizing rotation in the upper cervical spine when performing adjustive thrusts
- Minimizing extension in the upper cervical spine when performing adjustive thrusts
- Minimizing lateral flexion/bending in the upper cervical spine when performing adjustive thrusts
- Minimizing the combination of rotation AND extension in the upper cervical spine when performing adjustive thrusts
- Minimizing the combination of rotation AND lateral flexion/bending in the upper cervical spine when performing adjustive thrusts
- Minimizing the combination of lateral flexion/bending AND extension in the upper cervical spine when performing adjustive thrusts
- Other (please describe): ___________________________________________________

10. Entire cervical spine

- Which of the following descriptions most closely aligns with the modification(s) to adjusting technique of the *entire cervical spine* when you teach?
- Minimizing rotation in the cervical spine when performing adjustive thrusts
- Minimizing extension in the cervical spine when performing adjustive thrusts
- Minimizing lateral flexion/bending in the cervical spine when performing adjustive thrusts
- Minimizing the combination of rotation AND extension in the cervical spine when performing adjustive thrusts
- Minimizing the combination of rotation AND lateral flexion/bending in the cervical spine when performing adjustive thrusts
- Minimizing the combination of lateral flexion/bending AND extension in the cervical spine when performing adjustive thrusts
- Other (please describe): ___________________________________________________
- Neither
  - Continue to question 11.

11. Does the risk of CeAD affect how you teach adjusting technique of the *cervicothoracic spine*?

- If yes, which of the following descriptions most closely aligns with the modification(s) to adjusting technique of the *cervicothoracic spine* when you teach?
  - Minimizing rotation in the cervicothoracic spine when performing adjustive thrusts
  - Minimizing extension in the cervicothoracic spine when performing adjustive thrusts
  - Minimizing lateral flexion/bending in the cervicothoracic spine when performing adjustive thrusts
  - Minimizing the combination of rotation AND extension in the cervical and/or cervicothoracic spine when performing adjustive thrusts
  - Minimizing the combination of rotation AND lateral flexion/bending in the cervical and/or cervicothoracic spine when performing adjustive thrusts
  - Minimizing the combination of lateral flexion/bending AND extension in the cervical and/or cervicothoracic spine when performing adjustive thrusts
  - Other (please describe): __________________________________________________
- If no continue to question 12.

12. Is there anything else you would like to describe regarding your approach to teaching of chiropractic technique and CeAD?
